# Supplementary material for: Pediatric Patients in a Local Nepali Emergency Department: Presenting Complaints, Triage and Post-Discharge Mortality
Source: PubMed Central journal article supplement (PMC7502999; doi:10.1177/2333794x20947926), 2020-09-18
Supplement: Supplementary_Material.pdf [file Supplementary_Material.pdf]

## *Supplementary Material*

### **1 Supplementary: List of variables at emergency department (ED)**

1. Study Number
2. Hospital Number
3. Date of Admittance (DD/MM/YR)
4. Age (Years)
5. Sex (M/F)
6. Ethnicity
7. Time of Presentation
8. Temperature (Celsius)
9. Pulse (Beats per minute)
10. Respiration rate
11. Systolic Blood Pressure
12. Diastolic Blood Pressure
13. Oxygen Saturation
14. Glasgow Coma Scale (GCS)
15. Triage done (Yes/No)
16. Triage Code (Red/Orange/yellow/green)
17. Time of Triage
18. Time of Treatment
19. Presenting Complaint
20. Action in Emergency Room (Medication, Fluids, Oxygen, Antibiotics etc.)
21. Transfer to (General wards, ICU, OT)
22. ED disposition (Admitted, Discharged, LAMA/DOR, Referred)
23. Death (Yes/No)
24. Diagnosis at Discharge

**2 Supplementary: Telephone interview guide at 90 days of ED disposition**

1. Study Number
2. Hospital Number
3. Date of Interview
4. Visited Dhulikhel Hospital (DH) for same condition after the last visit (Yes/No)
5. Visited other health facility for same condition after the last visit to DH (Yes/No)
6. How long did you wait in ED before seeing a doctor (in minutes)
7. How do you like the services/patient management provided from ED (Very poor, Poor, OK/Fair, Good, very Good)
8. Health status now (Better, Unchanged, Worse, Died)
9. If died, Date of dead (DD,MM,YR)
10. Information given by (Patient, Relatives, Others)
11. a) In Labor case, if baby alive (Yes/No)
11. b) Number of baby delivered
12. Number of members in house living together
13. Main occupation
14. Education (Literate/Illiterate)
15. Completed education level
16. Smoking Tobacco (Yes/No)
17. If smoking tobacco, number per day
18. Fuel for Cooking (traditional cooking stove, improved cooking stove, gas stove, electricity)
19. Additional Information

### **3 Supplementary descriptions**

#### **3.1 Presenting Complaints Classification**

The presenting complaints were recorded by an emergency nurse in the emergency form. The presenting complaint was recorded in free text format (for example; a lady with chest pain and fever). The complaints were retrospectively classified into seven main categories. The process of categorizations was performed in three phases using STATA software. In the first phase, in total 761 “presenting complaint texts” (e.g. fever, chest pain, abdominal pain, limb fracture etc.) were generated and scored as 0 (no) or 1 (yes). In the second phase one or more “International Classification of Primary Care-2 (ICPC-2)” codes, were allocated to each patient based on the complaint categories first generated. In the third phase, one main presenting complaint was identified for each patient. Obvious related complaints were combined into one single group (e.g. fever and chills). The categories of seven main presenting complaints were; injuries, suspected infections, abdominal complaints, respiratory complaints, poisoning, unconsciousness and seizures, and other complaints. These categories were arranged in hierarchical order as shown in Figure 1A (“injuries” at first and “other complaints” at last; i.e. if a patient had injury irrespective to other complaints then he/she will be in injury category). Suspected infections complaint category included infections and also when presenting complaint was fever with no specification of organ system involved. The category “other complaints” included musculoskeletal, neurology, urinary, psychological and other complaints (general pain, eye/ear complaints etc.).

#### **3.2 Follow-up interviews**

Two trained research nurses conducted a structured telephone interview 90 days following the ED visit. The research nurse contacted all patients (n=2951) who provided phone numbers during the ED disposition. The research nurse contacted twice when patients were not reachable the first time. The telephone interview included information on 90-days mortality and exposure level to smoke.

## 4. Supplementary Tables

**Table S1: Categories of presenting complaints and use of ICPC-2 codes**

| <b>ICPC complaint Categories</b>         | <b>Included ICPC-2 Codes</b>                           |
|------------------------------------------|--------------------------------------------------------|
| <b>Poisoning</b>                         | A86                                                    |
| <b>Injuries</b>                          |                                                        |
| Fall Injury                              | A80 b*                                                 |
| Transport Accident                       | A80 a*                                                 |
| Physical Assault                         | Z25                                                    |
| Bite                                     | S12, S13                                               |
| Burn                                     | S14                                                    |
| Other Injury                             | A88, N80, D79, D80, R87, Y80, H76, H78, H79, F76, F79. |
| <b>Infections</b>                        |                                                        |
| Gastrointestinal Infection               | D70                                                    |
| Urinary Infection                        | U71                                                    |
| Respiratory Infection                    | R74, R75, R76, R78, R81, R83, A70                      |
| Fever (only)                             | A02, A03                                               |
| Other Infection                          | A78, A87, B70, N71, N73, S11                           |
| <b>Unconsciousness &amp; Seizure</b>     | A06, N07                                               |
| <b>Cardiovascular (CVD)</b>              |                                                        |
| CVD complaints                           | A11/K01, K04, K07                                      |
| CVD disease                              | K71, K73, K86                                          |
| <b>Respiratory complaints</b>            |                                                        |
| Short Breath                             | R02                                                    |
| Asthma                                   | R96                                                    |
| Other Respiratory                        | R03, R04, R05, R06, R07, R21, R24, R29, R99            |
| <b>Gynaecology complaints</b>            |                                                        |
| Pregnancy and Childbearing Complications | W03, W05, W29                                          |
| Menstruation Complaints                  | X02, X06, X07                                          |
| Female Genital Complaints                | X01, X14, X21, X29, X77                                |
| <b>Abdomen and Digestive</b>             |                                                        |
| Nausea, Vomiting & Diarrhoea             | D09, D10, D11                                          |
| Abdomen Pain                             | D01, D02, D06, D12, D25, D88                           |
| Other Digestive                          | D08, D13, D14, D15, D16, D17, D19, D20, D21, D24,      |
| <b>Other Complaints</b>                  |                                                        |
| Urinary                                  | U01, U02, U04, U05, U06, U07, U08, U95, U99            |
| Neurology                                | N01, N05, N06, N08, N17, N19, N28, N29, N85, N88, N89  |
| Musculoskeletal                          | L01, L02, L03, L05, L07, L09, L12, L14, L17, L18, L19, |
| Psychosocial Complaints                  | P04, P16, P19, P20, P29, P85, P86, P99                 |
| Other Complaints, NOS                    | A01, A04, A05, A08, A10, A16, A29, A92, A93, A94.      |

A80\_b-Fall Injuries, A80\_a-Road Transport Accidents, A80\_c-Animal Injuries, A66-Referred to study hospital for intensive care unit.\*New codes that does not comply with ICPC-2 codes.

**Table S2. Characteristics of total patients (n=6317) and included patients (n=5740) in the analysis of Table1A**

| <b>Characteristics</b>             | <b>Total patients</b> | <b>Not Included</b> | <b>Included</b> |
|------------------------------------|-----------------------|---------------------|-----------------|
| <b>Total Patients, n (%)</b>       | <b>6317</b>           | <b>577</b>          | <b>5740</b>     |
| <b>Age, median (IQR)*</b>          | 7 (2-12)              | 8 (4-12)            | 7 (2-12)        |
| <b>Age (years), n (%)</b>          |                       |                     |                 |
| <1                                 | 544 (9)               | 23 (4)              | 521 (9)         |
| 1-<5                               | 1871 (30)             | 131 (23)            | 1740 (30)       |
| 5-16                               | 3862 (61)             | 383 (66)            | 3479 (61)       |
| Information NA                     | 40 (1)                | 40 (7)              | 0               |
| <b>Female, n (%)</b>               | 2337 (37)             | 227 (39)            | 2110 (37)       |
| <b>Patient location, n(%)</b>      |                       |                     |                 |
| Rural                              | 3662 (58)             | 140 (24)            | 3522 (61)       |
| Urban                              | 1767 (28)             | 58 (10)             | 1709 (30)       |
| Information NA                     | 888 (14)              | 379 (66)            | 509 (9)         |
| <b>Ethnicity, n (%)</b>            |                       |                     |                 |
| Brahmin and Chhetri                | 2828 (45)             | 255 (44)            | 2573 (45)       |
| Janajati                           | 2797 (44)             | 251 (44)            | 2546 (44)       |
| Dalit                              | 548 (9)               | 41 (7)              | 507 (9)         |
| Other                              | 144 (2)               | 30 (5)              | 114 (2)         |
| <b>Presenting Complaints, n(%)</b> |                       |                     |                 |
| Injuries                           | 2284 (36)             | 7 (1)               | 2277 (40)       |
| Suspected Infections               | 2256 (36)             | 19 (3)              | 2237 (39)       |
| Abdominal complaints               | 453 (7)               | 2 (0.4)             | 451 (8)         |
| Respiratory complaints             | 257 (4)               | 3 (1)               | 254 (4)         |
| Poisoning                          | 89 (1)                | 1 (0.2)             | 88 (2)          |
| Unconsciousness and Seizures       | 86 (1)                | 4 (1)               | 82 (1)          |
| Other complaints                   | 375 (6)               | 24 (4)              | 351 (6)         |
| Information NA                     | 517 (8)               | 517 (90)            | 0               |

\*Within available information. IQR=Interquartile range. NA=Information not available.

**Table S3. Characteristics of total patients (n=5740) and included patients (n=4296) in the analysis of Table1B**

| <b>Characteristics</b>             | <b>Total patients</b> | <b>Not Included</b> | <b>Included</b> |
|------------------------------------|-----------------------|---------------------|-----------------|
| <b>Total Patients, n (%)</b>       | <b>5740</b>           | <b>1444</b>         | <b>4296</b>     |
| <b>Age, median (IQR)</b>           | 7 (2-12)              | 6 (2-12)            | 7 (2-12)        |
| <b>Age (years), n (%)</b>          |                       |                     |                 |
| <1                                 | 521 (9)               | 155 (11)            | 366 (9)         |
| 1-<5                               | 1740 (30)             | 465 (32)            | 1275 (30)       |
| 5-16                               | 3479 (61)             | 824 (57)            | 2655 (62)       |
| <b>Female, n (%)</b>               | 2110 (37)             | 550 (38)            | 1560 (36)       |
| <b>Patient location, n(%)</b>      |                       |                     |                 |
| Rural                              | 3522 (61)             | 845 (59)            | 2677 (62)       |
| Urban                              | 1709 (30)             | 389 (27)            | 1320 (31)       |
| Information NA                     | 509 (9)               | 210 (15)            | 299 (7)         |
| <b>Ethnicity, n (%)</b>            |                       |                     |                 |
| Brahmin and Chhetri                | 2573 (45)             | 643 (45)            | 1930 (45)       |
| Janajati                           | 2546 (44)             | 659 (46)            | 1887 (44)       |
| Dalit                              | 507 (9)               | 114 (8)             | 393 (9)         |
| Other                              | 114 (2)               | 28 (2)              | 86 (2)          |
| <b>Presenting Complaints, n(%)</b> |                       |                     |                 |
| Injuries                           | 2277 (40)             | 537 (37)            | 1740 (41)       |
| Suspected Infections               | 2237 (39)             | 578 (40)            | 1659 (39)       |
| Abdominal complaints               | 451 (8)               | 108 (7)             | 343 (8)         |
| Respiratory complaints             | 254 (4)               | 67 (5)              | 187 (4)         |
| Poisoning                          | 88 (2)                | 28 (2)              | 60 (1)          |
| Unconsciousness and Seizures       | 82 (1)                | 22 (2)              | 60 (1)          |
| Other complaints                   | 351 (6)               | 104 (7)             | 247 (6)         |

IQR=Interquartile range. NA=Information not available.

**Table S4. Characteristics of total patients (n=5740) and interviewed patients (n=961) included in the analysis of Table2**

| <b>Characteristics</b>             | <b>Total patients</b> | <b>Not Included</b> | <b>Included</b> |
|------------------------------------|-----------------------|---------------------|-----------------|
| <b>Total Patients, n (%)</b>       | <b>5740</b>           | <b>4779</b>         | <b>961</b>      |
| <b>Age, median (IQR)</b>           | 7 (2-12)              | 7 (2-12)            | 7 (2-12)        |
| <b>Age (years), n (%)</b>          |                       |                     |                 |
| <1                                 | 521 (9)               | 425 (9)             | 96 (10)         |
| 1-<5                               | 1740 (30)             | 1465 (31)           | 275 (29)        |
| 5-16                               | 3479 (61)             | 2889 (60)           | 590 (61)        |
| <b>Female, n (%)</b>               | 2110 (37)             | 1770 (37)           | 340 (35)        |
| <b>Patient location, n(%)</b>      |                       |                     |                 |
| Rural                              | 3522 (61)             | 2874 (60)           | 648 (67)        |
| Urban                              | 1709 (30)             | 1396 (29)           | 313 (33)        |
| Information NA                     | 509 (9)               | 509 (11)            | 0               |
| <b>Ethnicity, n (%)</b>            |                       |                     |                 |
| Brahmin and Chhetri                | 2573 (45)             | 2128 (45)           | 445 (46)        |
| Janajati                           | 2546 (44)             | 2130 (45)           | 416 (43)        |
| Dalit                              | 507 (9)               | 413 (9)             | 94 (10)         |
| Other                              | 114 (2)               | 108 (2)             | 6 (1)           |
| <b>Presenting Complaints, n(%)</b> |                       |                     |                 |
| Injuries                           | 2277 (40)             | 1911 (40)           | 366 (38)        |
| Suspected Infections               | 2237 (39)             | 1857 (39)           | 380 (40)        |
| Abdominal complaints               | 451 (8)               | 361 (8)             | 90 (9)          |
| Respiratory complaints             | 254 (4)               | 198 (4)             | 56 (6)          |
| Poisoning                          | 88 (2)                | 75 (2)              | 13 (1)          |
| Unconsciousness and Seizures       | 82 (1)                | 73 (2)              | 9 (1)           |
| Other complaints                   | 351 (6)               | 304 (6)             | 47 (5)          |

IQR=Interquartile range. NA=Information not available.

**Table S5. Characteristics of total patients (n=5740) and triaged patients (n=1248) included in the analysis of Table 3A**

| <b>Characteristics</b>             | <b>Total patients</b> | <b>Not Included</b> | <b>Included</b> |
|------------------------------------|-----------------------|---------------------|-----------------|
| <b>Total Patients, n (%)</b>       | <b>5740</b>           | <b>4492</b>         | <b>1248</b>     |
| <b>Age, median (IQR)</b>           | 7 (2-12)              | 7 (2-12)            | 7 (2-13)        |
| <b>Age (years), n (%)</b>          |                       |                     |                 |
| <1                                 | 521 (9)               | 411 (9)             | 110 (9)         |
| 1-<5                               | 1740 (30)             | 1379 (31)           | 361 (29)        |
| 5-16                               | 3479 (61)             | 2702 (60)           | 777 (62)        |
| <b>Female, n (%)</b>               | 2110 (37)             | 1644 (37)           | 466 (37)        |
| <b>Patient location, n(%)</b>      |                       |                     |                 |
| Rural                              | 3522 (61)             | 2702 (60)           | 820 (66)        |
| Urban                              | 1709 (30)             | 1323 (29)           | 386 (31)        |
| Information NA                     | 509 (9)               | 467 (10)            | 42 (3)          |
| <b>Ethnicity, n (%)</b>            |                       |                     |                 |
| Brahmin and Chhetri                | 2573 (45)             | 2033 (45)           | 540 (43)        |
| Janajati                           | 2546 (44)             | 1967 (44)           | 579 (46)        |
| Dalit                              | 507 (9)               | 396 (9)             | 111 (9)         |
| Other                              | 114 (2)               | 96 (2)              | 18 (1)          |
| <b>Presenting Complaints, n(%)</b> |                       |                     |                 |
| Injuries                           | 2277 (40)             | 1771 (39)           | 506 (41)        |
| Suspected Infections               | 2237 (39)             | 1763 (39)           | 474 (38)        |
| Abdominal complaints               | 451 (8)               | 348 (8)             | 103 (8)         |
| Respiratory complaints             | 254 (4)               | 195 (4)             | 59 (5)          |
| Poisoning                          | 88 (2)                | 68 (2)              | 20 (2)          |
| Unconsciousness and Seizures       | 82 (1)                | 62 (1)              | 20 (2)          |
| Other complaints                   | 351 (6)               | 285 (6)             | 66 (5)          |

IQR=Interquartile range. NA=Information not available.



**Table S6. Characteristics of total triaged patients (n=1462) and those included interviews (n=497) that are included in the analysis of Table 4**

| <b>Characteristics</b>             | <b>Total patients</b> | <b>Not Included</b> | <b>Included</b> |
|------------------------------------|-----------------------|---------------------|-----------------|
| <b>Total Patients, n (%)</b>       | <b>1462</b>           | <b>965</b>          | <b>497</b>      |
| <b>Age, median (IQR)</b>           | 7 (2-13)              | 7 (2-13)            | 8 (2-12)        |
| <b>Age (years), n (%)</b>          |                       |                     |                 |
| <1                                 | 135 (9)               | 87 (9)              | 48 (10)         |
| 1-<5                               | 420 (29)              | 294 (30)            | 126 (25)        |
| 5-16                               | 907 (62)              | 584 (61)            | 323 (65)        |
| <b>Female, n (%)</b>               | 550 (38)              | 366 (38)            | 184 (37)        |
| <b>Patient location, n(%)</b>      |                       |                     |                 |
| Rural                              | 972 (66)              | 636 (66)            | 336 (68)        |
| Urban                              | 442 (30)              | 281 (29)            | 161 (32)        |
| Information NA                     | 48 (3)                | 48 (5)              | 0               |
| <b>Ethnicity, n (%)</b>            |                       |                     |                 |
| Brahmin and Chhetri                | 630 (43)              | 397 (41)            | 233 (47)        |
| Janajati                           | 676 (46)              | 459 (48)            | 217 (44)        |
| Dalit                              | 135 (9)               | 89 (9)              | 46 (9)          |
| Other                              | 21 (1)                | 20 (2)              | 1 (0.2)         |
| <b>Presenting Complaints, n(%)</b> |                       |                     |                 |
| Injuries                           | 575 (39)              | 395 (41)            | 180 (36)        |
| Suspected Infections               | 571 (39)              | 366 (38)            | 205 (41)        |
| Abdominal complaints               | 120 (8)               | 72 (7)              | 48 (10)         |
| Respiratory complaints             | 66 (5)                | 41 (4)              | 25 (5)          |
| Poisoning                          | 24 (2)                | 17 (2)              | 7 (1)           |
| Unconsciousness and Seizures       | 23 (2)                | 18 (2)              | 5 (1)           |
| Other complaints                   | 83 (6)                | 56 (6)              | 27 (5)          |

IQR=Interquartile range. NA=Information not available.

**Table S7. Characteristics of patients before earthquakes and after earthquakes**

| <b>Characteristics</b>             | <b>Total</b> | <b>Before EQ</b> | <b>After EQ</b>  |
|------------------------------------|--------------|------------------|------------------|
| <b>Total Patients, n (%)</b>       | <b>5740</b>  | <b>2239 (39)</b> | <b>2501 (61)</b> |
| <b>Age, median (IQR)</b>           | 7 (2-12)     | 7 (3-12)         | 6 (2-12)         |
| <b>Age (years), n (%)</b>          |              |                  |                  |
| <1                                 | 521 (9)      | 115 (5)          | 406 (12)         |
| 1-<5                               | 1740 (30)    | 685 (31)         | 1055 (30)        |
| 5-16                               | 3479 (61)    | 1439 (64)        | 2040 (58)        |
| <b>Female, n (%)</b>               | 2110 (37)    | 814 (36)         | 1296 (37)        |
| <b>Patient location, n(%)</b>      |              |                  |                  |
| Rural                              | 3522 (61)    | 1298 (58)        | 2224 (64)        |
| Urban                              | 1709 (30)    | 611 (27)         | 1098 (31)        |
| Information NA                     | 509 (9)      | 330 (15)         | 179 (5)          |
| <b>Ethnicity, n (%)</b>            |              |                  |                  |
| Brahmin and Chhetri                | 2573 (45)    | 1082 (48)        | 1491 (43)        |
| Janajati                           | 2546 (44)    | 942 (42)         | 1604 (46)        |
| Dalit                              | 507 (9)      | 161 (7)          | 346 (10)         |
| Other                              | 114 (2)      | 54 (2)           | 60 (2)           |
| <b>Presenting Complaints, n(%)</b> |              |                  |                  |
| Injuries                           | 2277 (40)    | 917 (41)         | 1360 (39)        |
| Suspected Infections               | 2237 (39)    | 877 (39)         | 1360 (39)        |
| Abdominal complaints               | 451 (8)      | 158 (7)          | 293 (8)          |
| Respiratory complaints             | 254 (4)      | 97 (4)           | 157 (4)          |
| Poisoning                          | 88 (2)       | 31 (2)           | 57 (2)           |
| Unconsciousness and Seizures       | 82 (1)       | 30 (1)           | 52 (2)           |
| Other complaints                   | 351 (6)      | 129 (6)          | 222 (6)          |

EQ=Eathquake period. IQR=Interquartile range. NA=Information not available.
